# Supplementary material for: JAK inhibition reduces SARS-CoV-2 liver infectivity and modulates inflammatory responses to reduce morbidity and mortality
Source: PubMed Central journal article supplement — Sci Adv. 2021 Jan 1;7(1):eabe4724. doi: 10.1126/sciadv.abe4724 (PMC7775747; doi:10.1126/sciadv.abe4724), 2021-01-01
Supplement: abe4724_1.pdf [file abe4724_1.pdf]

## Supplementary Materials for

### **JAK inhibition reduces SARS-CoV-2 liver infectivity and modulates inflammatory responses to reduce morbidity and mortality**

Justin Stebbing\*, Ginés Sánchez Nievas, Marco Falcone, Sonia Youhanna, Peter Richardson, Silvia Ottaviani, Joanne X. Shen, Christian Sommerauer, Giusy Tiseo, Lorenzo Ghiadoni, Agostino Viridis, Fabio Monzani, Luis Romero Rizos, Francesco Forfori, Almudena Avendaño-Céspedes, Salvatore De Marco, Laura Carrozzi, Fabio Lena, Pedro Manuel Sánchez-Jurado, Leonardo Gianluca Lacerenza, Nencioni Cesira, David Caldevilla-Bernardo, Antonio Perrella, Laura Niccoli, Lourdes Sáez Méndez, Daniela Matarrese, Delia Goletti, Yee-Joo Tan, Vanessa Monteil, George Dranitsaris, Fabrizio Cantini, Alessio Farcomeni, Shuchismita Dutta, Stephen K. Burley, Haibo Zhang, Mauro Pistello, William Li, Marta Mas Romero, Fernando Andrés Pretel, Rafaela Sánchez Simón-Talero, Rafael García-Molina, Claudia Kutte, James H. Felce, Zehra F. Nizami, Andras G. Miklosi, Josef M. Penninger, Francesco Menichetti, Ali Mirazimi, Pedro Abizanda and Volker M. Lauschke\*

\*Corresponding author. Email: [j.stebbing@imperial.ac.uk](mailto:j.stebbing@imperial.ac.uk) (J.S.) and [volker.lauschke@ki.se](mailto:volker.lauschke@ki.se) (V.M.L.)

Published 13 November 2020, *Sci. Adv.* **6**, eabe4724 (2020)

DOI: 10.1126/sciadv.abe4724

#### **This PDF file includes:**

Figs. S1 to S4  
Tables S1 to S2

## Supplementary Figure 1

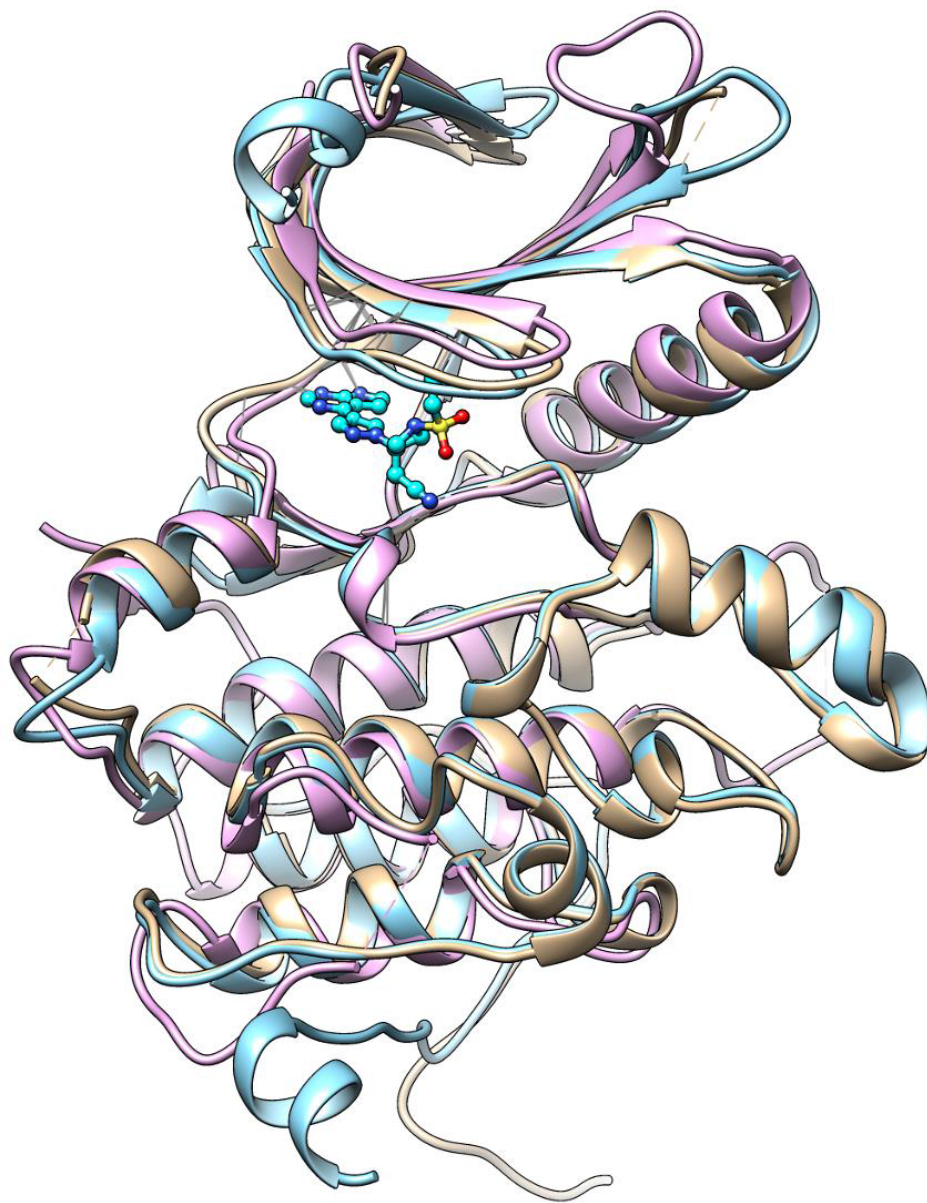

**Figure S1. Ribbon diagram overlay of the catalytic domains of BIKE (tan; PDB ID 4w9x), AAK1 (light blue; PDB ID 4wsq), and GAK (light purple; PDB ID 4y8d).** This shows baricitinib bound to BIKE (ball-and-stick ligand atom color coding: C-cyan, N-blue, O-red, S-yellow). Pairwise sequence identities and root-mean-square-deviations on alpha Carbon atomic coordinates (r.m.s.d.s) were as follows: BIKE vs. AAK1: sequence identity=75%, r.m.s.d. =1.0Å; BIKE vs. GAK: sequence identity=38%, r.m.s.d.=1.6Å).

## Supplementary Figure 2

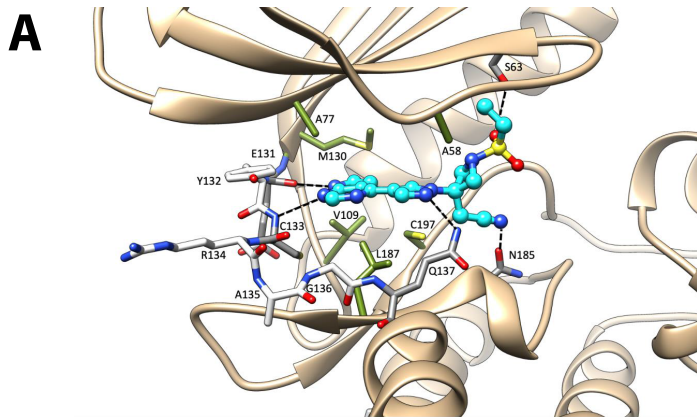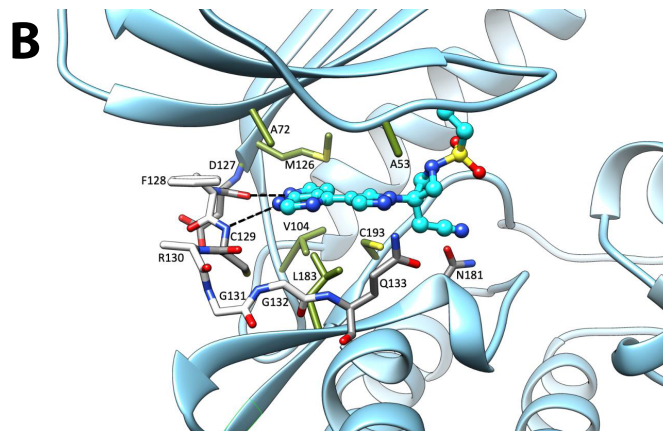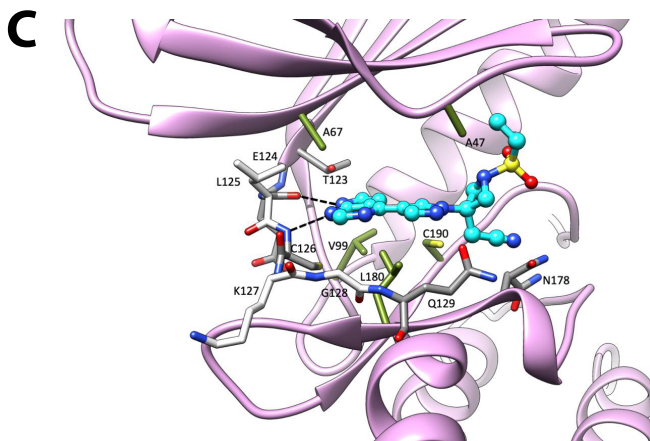

**Figure S2. NAK family member enzyme active sites showing experimentally-determined or modeled binding of baricitinib.** The same color code as in Figure S1 is used, with labeled stick figure residues (protein atom color coding: C-white, grey, or green; N-blue; O-red; S-yellow) that make direct hydrogen bonds (C- grey; dashed lines) or van der Waals interactions (C-green;  $< \sim 4\text{\AA}$ ) with the drug. **A**, BIKE with bound baricitinib. **B**, AAK1 and **C**, GAK, both with superposition docked baricitinib showing predicted hydrogen bonds with the hinge region. The predicted modes of baricitinib binding to AAK1 and GAK are devoid of major steric clashes and consistent with reported  $K_d$  values.

# Supplementary Figure 3

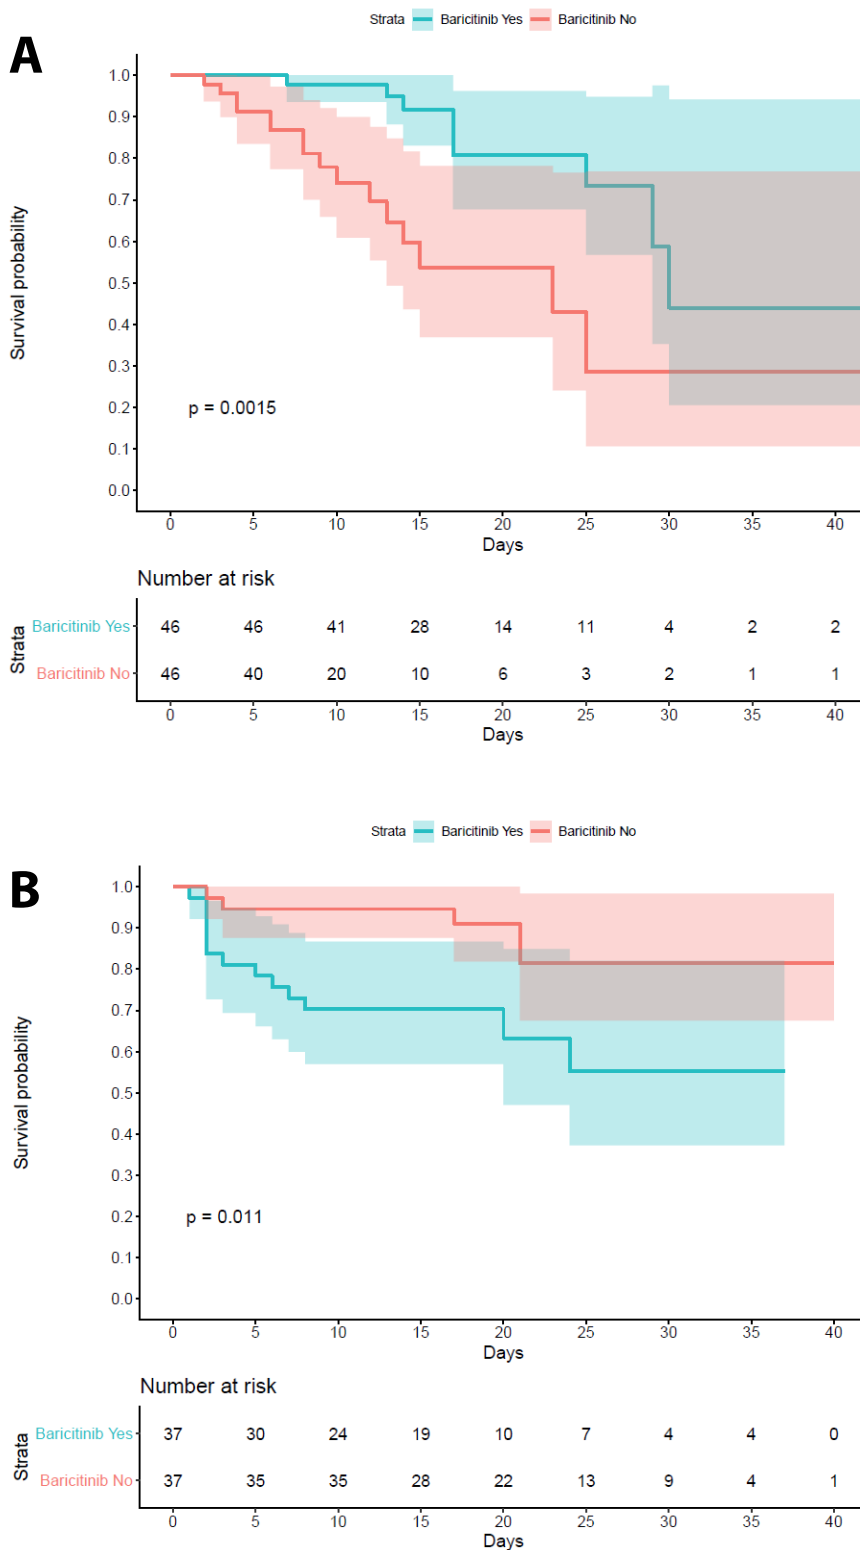

**Figure S3. Kaplan-Meier analysis.** Unmerged data from the Albacete Hospital (A) and University of Pisa (B) cohorts with 453 participants (92 on baricitinib and 361 in the control group).



Supplementary Figure 4

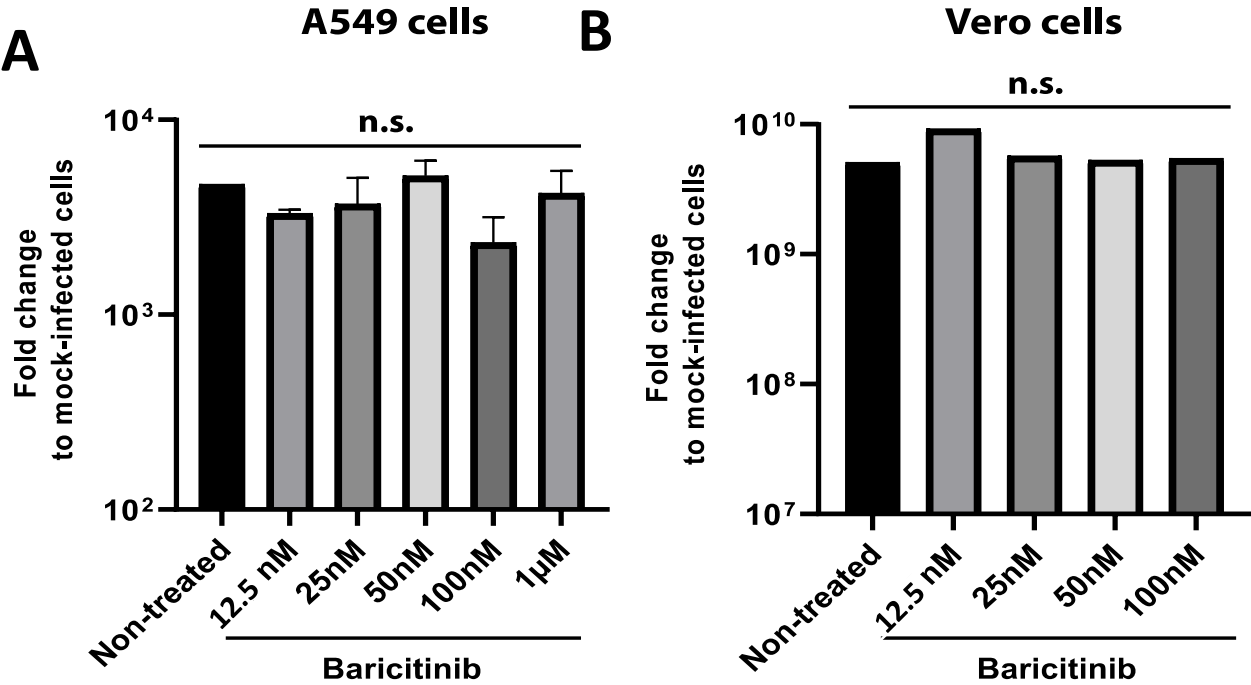

**Figure S4. Commonly used cell models of viral infection are not suitable to study baricitinib effects.** Baricitinib did not have antiviral effects in A549 human lung epithelial cells (A), and monkey kidney cells (B).

**Table S1. Computation modelling to assess mutational impact on kinase binding. Results of superposition docking of baricitinib with observed point mutant 3D structures of BIKE, AAK1, and GAK.**

| <b>Protein</b> | <b>Wild-type residue</b> | <b>Observed/predicted interaction between drug and protein</b> | <b>Mutation</b> | <b>Observed mutation frequency</b> | <b>Likelihood of protein loss of function due to impaired structure stability</b> | <b>Likelihood of steric clash between baricitinib and mutant protein</b> |
|----------------|--------------------------|----------------------------------------------------------------|-----------------|------------------------------------|-----------------------------------------------------------------------------------|--------------------------------------------------------------------------|
| BIKE           | Ala58                    | van der Waals                                                  | Ala58→Asp       | 2.4%                               | None                                                                              | Low                                                                      |
|                |                          | van der Waals                                                  | Ala58→Val       | <0.1%                              | None                                                                              | Low                                                                      |
|                | Glu131                   | Backbone H-bond                                                | Glu131→Gln      | <0.1%                              | None                                                                              | None                                                                     |
|                |                          | Backbone H-bond                                                | Glu131→Lys      | <0.1%                              | None                                                                              | None                                                                     |
|                | Arg134                   | None                                                           | Arg134→Glu      | <0.1%                              | None                                                                              | None                                                                     |
|                |                          | None                                                           | Arg134→Leu      | <0.1%                              | None                                                                              | None                                                                     |
|                | Ala135                   | None                                                           | Ala135→Thr      | <0.1%                              | None                                                                              | None                                                                     |
| AAK1           | Ala72                    | van der Waals                                                  | Ala72→Thr       | <0.1%                              | None                                                                              | Low                                                                      |
|                | Gly132                   | None                                                           | Gly132→Val      | <0.1%                              | None                                                                              | None                                                                     |
| GAK            | Glu124→Val               | Backbone H-bond                                                | Glu124→Val      | <0.1%                              | None                                                                              | None                                                                     |
|                | Gly128→Glu               | None                                                           | Gly128→Glu      | <0.1%                              | None                                                                              | None                                                                     |
|                | Gln129→Arg               | None                                                           | Gln129→Arg      | <0.1%                              | None                                                                              | None                                                                     |

**Table S2. Baseline demographic, clinical, and laboratory characteristics of COVID-19 patients treated with baricitinib and/or with standard COVID-19 therapy from the Misericordia Hospital of Grosseto. A comparison with other groups could not be performed. A dose of 4mg daily baricitinib was given for 10-14 days.**

| <b>Features at baseline</b>                               | <b>Patients (n=25)</b> |
|-----------------------------------------------------------|------------------------|
| Male/female, N (%)                                        | 15/10 (60/40)          |
| Age years, median (IQR)                                   | 65 (42-89)             |
| Days interval from symptoms onset and therapy commencing  | 11 (3-27)              |
| Cough, N (%)                                              | 9 (36)                 |
| Dyspnea, N (%)                                            | 10 (40)                |
| Sputum production, N (%)                                  | 0 (0)                  |
| Headache, N (%)                                           | 2 (8)                  |
| Diarrhea, N (%)                                           | 2 (8)                  |
| Ageusia/Anosmia, N (%)                                    | 0 (0)                  |
| Hypertension, N (%)                                       | 9 (36)                 |
| Diabetes, N (%)                                           | 2 (8)                  |
| COPD, N (%)                                               | 0 (0)                  |
| CVD, N (%)                                                | 2 (8)                  |
| Malignancy, N (%)                                         | 4 (16)                 |
| Fever °C (IQR)                                            | 37.8 (37.1-39.5)       |
| Respiratory rate N/min                                    | 15 (13-20)             |
| SpO2 (%)                                                  | 96 (85-100)            |
| PaO2/FiO2, median (IQR)                                   | 271 (162-408)          |
| SBP mm/Hg, median (IQR)                                   | 130 (110-160)          |
| DBP mm/Hg, median (IQR)                                   | 75 (60-99)             |
| WBC (x10 <sup>9</sup> /L), median (IQR)                   | 6.13 (3.03-10.52)      |
| Neutrophils (x10 <sup>9</sup> /L), median (IQR)           | 4.22 (1.22-7.88)       |
| Lymphocytes (x10 <sup>9</sup> /L), median (IQR)           | 1.16 (0.46-2.65)       |
| Hemoglobin (g/dL), median (IQR)                           | 14.6 (10.07-17)        |
| Platelets (x10 <sup>9</sup> /L), median (IQR)             | 196 (91-563)           |
| ALT (IU/L), median (IQR)                                  | 29 (12-273)            |
| AST (IU/L), median (IQR)                                  | 28 (18-147)            |
| Creatinine (mg/dl), median (IQR)                          | 0.94 (0.47-1.94)       |
| Clearance creatinine (ml/min), median (IQR)               | 78.6 (37.9-152.6)      |
| D-dimer mcg/mL, median (IQR)                              | 0.88 (0.22-56.83)      |
| Fibrinogen mg/dL, median (IQR)                            | 504 (219-901)          |
| Ferritin ng/mL, median (IQR)                              | 1076 (182-2690)        |
| Antibiotic therapy azithromycin, patient number (%)       | 22 (88)                |
| Hydroxychloroquine 200mg bd, patient number (%)           | 18 (72)                |
| Lopinavir 200 mg /ritonavir 50 mg od, patient number (%)  | 6 (24)                 |
| Darunavir 800 mg/colbicistat 150mg od, patient number (%) | 3 (12)                 |
| Tocilizumab 8 mg/kg, patient number (%)                   | 1 (4)                  |
| No 'anti-COVID' drugs , patient number (%)                | 6 (24)                 |
